# Supplementary material
Source: PubMed Central journal article supplement (PMC3957963)
Supplement: JVI.02995-13_zjv999098760so1.pdf [file JVI.02995-13_zjv999098760so1.pdf]

| <b>Supplementary Item</b> | <b>Title or Caption</b>                                                                                    |
|---------------------------|------------------------------------------------------------------------------------------------------------|
| Supplementary Figure 1.   | Genomic distribution of ALV-J integration sites                                                            |
| Supplementary Figure 2.   | GSEA analyses identified gene classes that were significantly up-regulated or down-regulated in ML groups. |
| Supplementary Table 1.    | Primer sequences.                                                                                          |
| Supplementary Table 2.    | Next-generation sequencing statistics.                                                                     |
| Supplementary Table 3.    | Characterization of 241 ALV-J integration sites from ML samples.                                           |
| Supplementary Table 4.    | Validation of the ALV-J integration sites..                                                                |
| Supplementary Table 5.    | GSEA over-represented molecular pathways and functions in ML groups with respect to non-tumoral samples    |
| Supplementary Note 1.     | List of genes and their gene classes that were significantly deregulated in different ML groups.           |

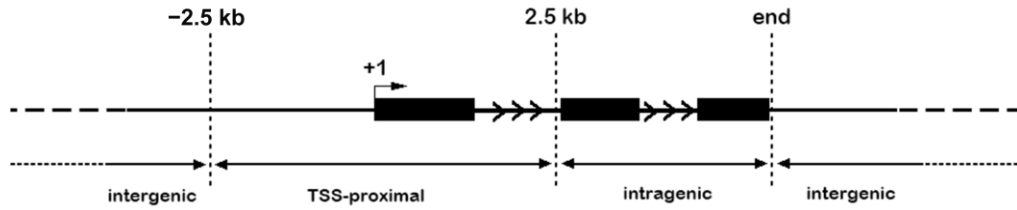

14

15 **Supplementary Figure 1. Genomic distribution of ALV-J integration sites**

16 ALV-J integration sites were annotated as TSS-proximal when located at  $\pm 2.5$  kb  
 17 from a transcription start site (TSS) of a known gene (UCSC definition), intragenic  
 18 when inside a gene at 2.5 kb from the TSS, and intergenic in any other case. Black  
 19 bars represent exons of a schematic gene, arrowheads indicate the direction of  
 20 transcription.

21

**a.** Apoptosis  
tumor versus normal

|                 |             |
|-----------------|-------------|
| NES             | -1.8794032  |
| Nominal p-value | 0.012244898 |
| FDR q-value     | 0.03823706  |
| FWER p-Value    | 0.452       |

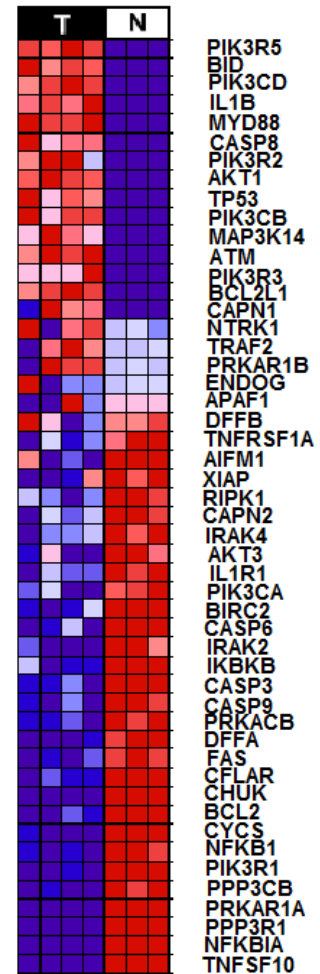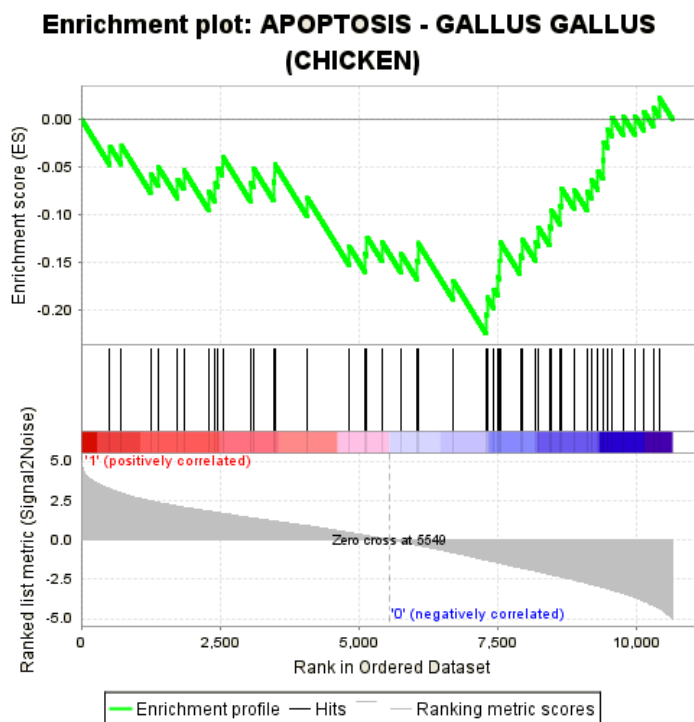

22

23

**b.**

ECM-receptor interaction  
tumor versus normal

|                 |             |
|-----------------|-------------|
| NES             | -2.7174306  |
| Nominal p-value | 0.0         |
| FDR q-value     | 5.679598E-4 |
| FWER p-Value    | 0.0020      |

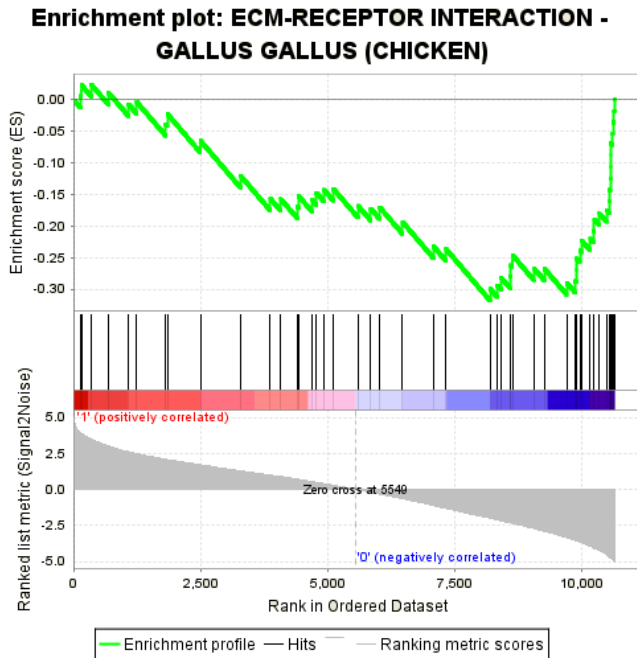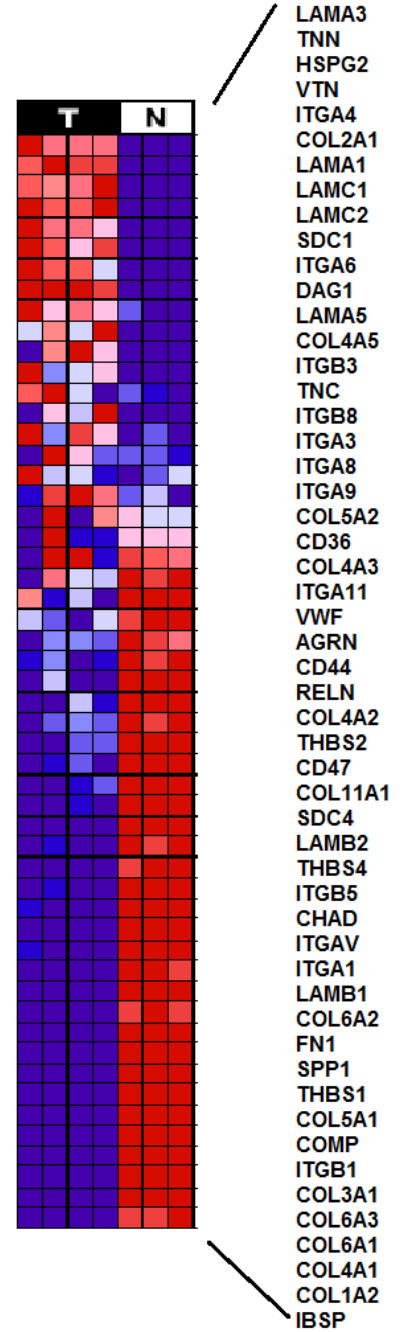

27  
28

C.

**Focal adhesion**  
tumor versus normal

|                 |              |
|-----------------|--------------|
| NES             | -2.7084944   |
| Nominal p-value | 0.0          |
| FDR q-value     | 4.5436784E-4 |
| FWER p-Value    | 0.0020       |

**Enrichment plot: FOCAL ADHESION - GALLUS GALLUS (CHICKEN)**

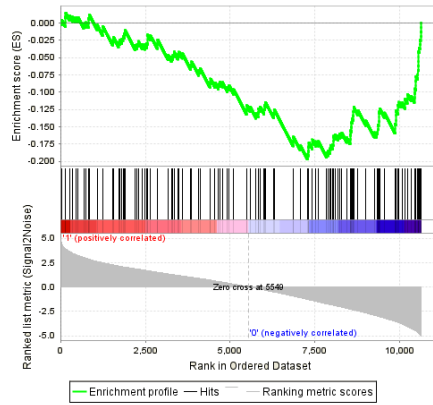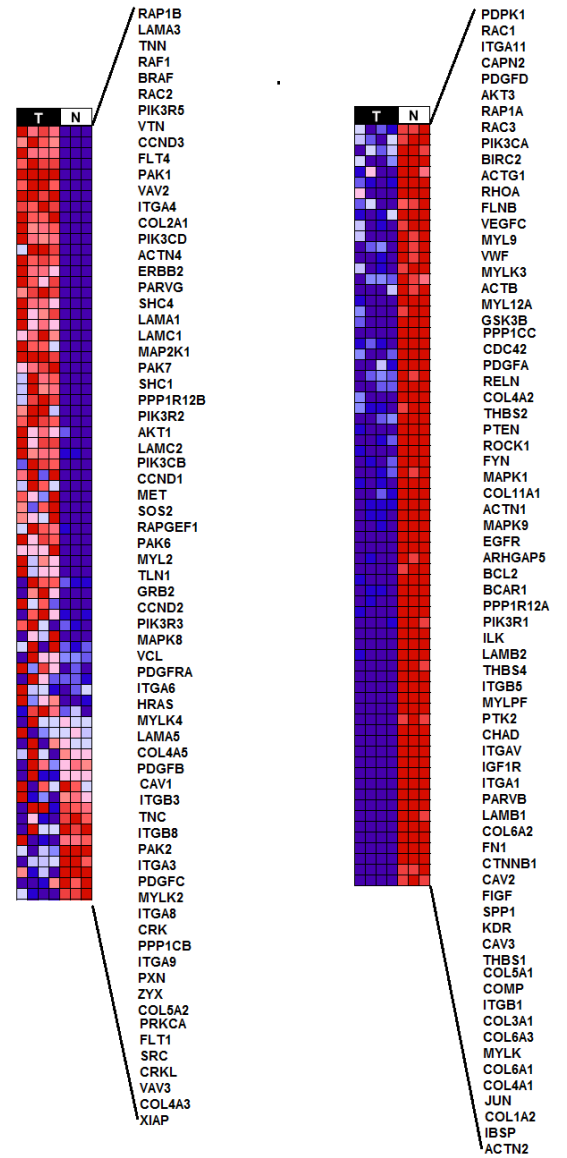

29  
30

d.

JAK-STAT signaling pathway  
tumor versus normal

|                 |             |
|-----------------|-------------|
| NES             | 1.7702438   |
| Nominal p-value | 0.024952015 |
| FDR q-value     | 0.28014386  |
| FWER p-Value    | 0.663       |

Enrichment plot: JAK-STAT SIGNALING PATHWAY -  
GALLUS GALLUS (CHICKEN)

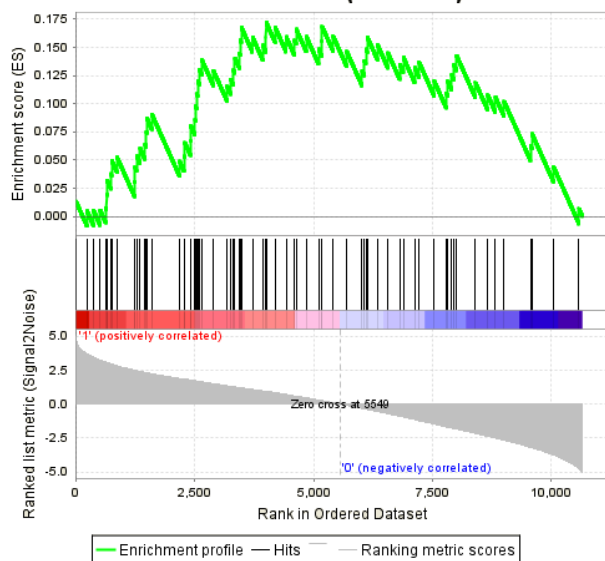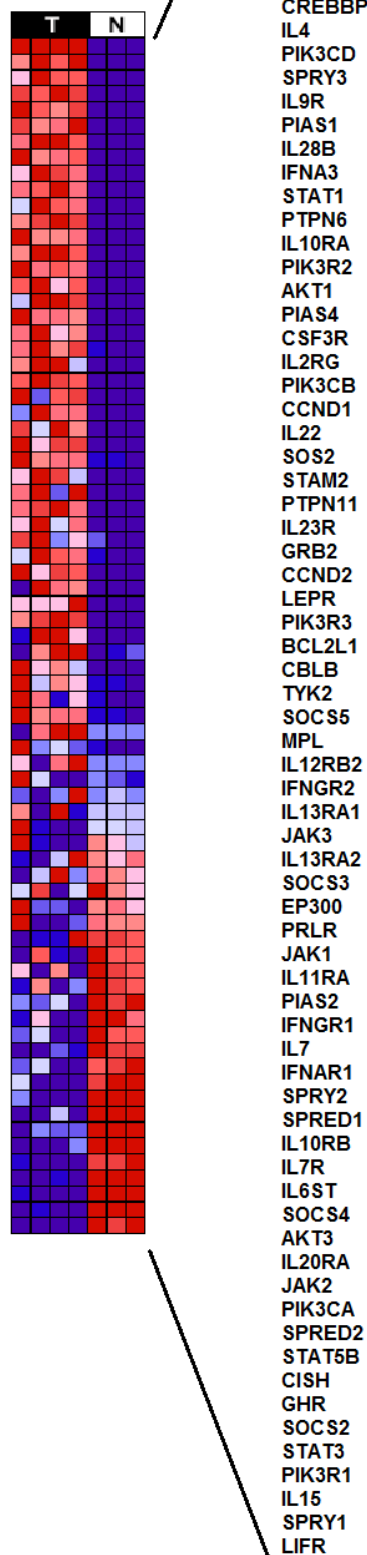

32 **Supplementary Figure 1. GSEA analyses identified gene classes that were**  
33 **significantly up-regulated or down-regulated in ML groups.**

34 Expression profiles of ML groups were compared with respect to three pooled  
35 non-tumoral tissues from the different genetic backgrounds by gene set enrichment  
36 analysis (GSEA) (see also Supplementary Table 5). On the left, a table summarizes the  
37 GSEA statistics (NES: normalized enrichment score; FDR q-value: false discovery  
38 rate; FWER p-Value: family-wise error rate; for values <0.01, 0.0 is indicated). The  
39 enrichment plot shows the over-representation at the top/bottom of the ranked gene  
40 set. The heat map shows all significant differentially-expressed genes of the given  
41 gene set between groups (N: normal tissue; T: tumor) (from blue = low expression to  
42 red = high expression). Gene symbols are shown on the right. (a–c) Genes that were  
43 down-regulated for apoptosis, ECM-receptor interaction, and focal adhesion were  
44 found in all the ML groups. (d) Genes of the JAK-STAT signaling pathway were  
45 significantly up-regulated in ML groups.

46

47



48 Supplementary Tables 1-7 are provided as Excel files.

49

50 **Supplementary Table 1. Primer sequences.**

51 Sequences of primers used to perform qRT-PCR for the detection of ALV-J-induced  
52 MLs gene expression level.

53

54 **Supplementary Table 2. Next-generation sequencing statistics**

55 Data represent averages of duplicate runs. Reads matches to the ALV-J target were  
56 determined by paired-end alignment of all raw sequence data to the ALV-J genome  
57 using the Burrows-Wheeler Aligner and Short Oligonucleotide Analysis software  
58 package. 'Reads mapped to viral genome' was calculated by comparing the sequenced  
59 frequency of ALV-J sequences compared to the total reads. 'Reads mapped to chicken  
60 genome' represents the average number of sequenced reads that were fully matched to  
61 the chicken genome.

62

63 **Supplementary Table 3. Characterization of 241 ALV-J integration sites from  
64 ML samples**

65 Each row represents an independent integration. (a) ALV-J-induced chicken tumor  
66 identifier. (b) Sequence identifier from Illumina HiSeq2000 pyrosequencing. (c)  
67 Matching identity of the raw sequence reads and the UCSC galGAL4 genomic  
68 sequences. (d) Chromosome to which the integration maps. (e) Position of the  
69 integration site on the chromosome in nucleotides. (f) Orientation of ALV-J with  
70 respect to the direction of transcription of the targeted gene, indicated as forward or  
71 reverse. (g) Ref Seq gene identifier of the gene closest to ALV-J integration. (h) Ref  
72 Seq gene symbol of the gene closest to ALV-J integration. (i) Distribution of ALV-J  
73 integration sites in the genome of ML samples. Integrations were annotated for each  
74 patient as 'TSS-proximal' when they occurred within a distance of  $\pm 2.5$  kb from the  
75 TSS of at least one gene, as 'intragenic' when inserted into at least one gene at a  
76 distance of 2.5 kb from the TSS, and as 'intergenic' in all other cases (see Figure 3a).  
77 Integration sites are sorted for Chromosome and Integration Locus.

78

79 **Supplementary Table 4. Validation result for the ALV-J integration sites.**

80 Twenty-three integration sites at the six affected genes for PCR analysis. Verification  
81 of ALV-J integrations with respect to the sequence of the targeted gene identifier from  
82 Illumina HiSeq2000 pyrosequencing, indicated as yes or no.

83

84 **Supplementary Table 5. GSEA over-represented molecular pathways and  
85 functions in ML groups with respect to non-tumoral samples.**

86 Over-represented gene-sets of Cellular Process by GSEA using setting: Real. Dataset:  
87 expression levels of ML groups were compared with respect to the expression of  
88 pooled non-tumoral samples; Trend: up-regulation (Up) or down-regulation (Down)  
89 of genes belonging to a given pathway is indicated; Gene Set: Description of  
90 significantly over-represented gene sets belonging to specific Canonical Pathway;  
91 Size: size of the given Canonical Pathways gene set. ES: Enrichment Score; NES:

92 Normalized Enrichment Score; NOM p-val: Nominal *P*-value; FDR q-val: False  
 93 Discovery Rate; FWER p-val: Family Wise Error Rate corrected *P*-value.

94

95 **Supplementary Note 1. List of genes belonging to gene classes significantly**  
 96 **deregulated in different ML groups.**

97 We used GSEA analyses to identify gene classes that were significantly up-regulated  
 98 or down-regulated in ML groups. In **Figure 5b** we showed the heat map  
 99 representation of the over-expressed genes of Oxidative Phosphorylation in MLs. The  
 100 list of genes showed in the heat-map, from top to bottom is:

101

| PROBE    | RANK IN GENE LIST | RANK METRIC SCORE | RUNNING ES  | CORE ENRICHMENT |
|----------|-------------------|-------------------|-------------|-----------------|
| ATP6V0E2 | 948               | 2.721667          | -0.07928894 | No              |
| COX7A2   | 1600              | 2.239329          | -0.13043955 | No              |
| TCIRG1   | 1850              | 2.06686           | -0.14350395 | No              |
| ATP6V0A4 | 2579              | 1.671428          | -0.20194969 | No              |
| NDUFA10  | 2827              | 1.52627           | -0.2148246  | No              |
| COX8A    | 2927              | 1.478789          | -0.21367773 | No              |
| ND6      | 3149              | 1.356025          | -0.22408935 | No              |
| ATP6V1G3 | 3548              | 1.155021          | -0.2512703  | No              |
| NDUFA9   | 3881              | 0.992072          | -0.27219826 | No              |
| COX15    | 3884              | 0.991223          | -0.26186144 | No              |
| ND4L     | 4509              | 0.655861          | -0.310454   | No              |
| ATP8     | 4654              | 0.56324           | -0.31357053 | No              |
| ND1      | 4672              | 0.553792          | -0.3046548  | No              |
| ND5      | 4944              | 0.397635          | -0.31980354 | No              |
| ATP6V0D1 | 5153              | 0.268774          | -0.32898352 | No              |
| COX1     | 5300              | 0.17753           | -0.33228952 | No              |
| ND2      | 5365              | 0.132001          | -0.32782668 | No              |
| COX2     | 5376              | 0.125711          | -0.31824777 | No              |
| ATP6     | 5493              | 0.043668          | -0.31871152 | No              |
| ND3      | 5553              | -0.00408          | -0.31377497 | No              |
| NDUFS5   | 5744              | -0.11414          | -0.3212496  | No              |
| ATP6V0A1 | 5767              | -0.1311           | -0.3128076  | No              |
| COX3     | 5865              | -0.20134          | -0.31147125 | No              |
| PPA1     | 5915              | -0.23982          | -0.30558726 | No              |
| CYTB     | 5938              | -0.25337          | -0.29714528 | No              |
| ATP6V1H  | 6020              | -0.31378          | -0.29429305 | No              |
| LHPP     | 6242              | -0.46544          | -0.30470467 | No              |
| ND4      | 6290              | -0.50044          | -0.29863122 | No              |
| NDUFV3   | 6441              | -0.6074           | -0.3023162  | No              |
| NDUFB4   | 6486              | -0.64103          | -0.29595852 | No              |
| COX11    | 6503              | -0.65563          | -0.28694806 | No              |
| PPA2     | 6695              | -0.80102          | -0.29451743 | No              |
| COX10    | 7127              | -1.13599          | -0.32482484 | No              |

|                 |      |          |             |     |
|-----------------|------|----------|-------------|-----|
| <b>ATP6V1B2</b> | 7308 | -1.29947 | -0.33135206 | No  |
| <b>ATP5G3</b>   | 7313 | -1.30206 | -0.32120472 | No  |
| <b>NDUFB2</b>   | 7630 | -1.54408 | -0.34061682 | No  |
| <b>ATP6V0E1</b> | 7684 | -1.5992  | -0.33511183 | No  |
| <b>COX7A2L</b>  | 8114 | -1.9129  | -0.36522976 | Yes |
| <b>NDUFB8</b>   | 8188 | -1.98429 | -0.3616196  | Yes |
| <b>ATP6V1A</b>  | 8217 | -2.00365 | -0.35374603 | Yes |
| <b>COX5A</b>    | 8308 | -2.07536 | -0.3517465  | Yes |
| <b>NDUFA11</b>  | 8364 | -2.10563 | -0.34643096 | Yes |
| <b>ATP6V1E1</b> | 8615 | -2.3288  | -0.3595901  | Yes |
| <b>ATP6V0A2</b> | 8780 | -2.45829 | -0.36460146 | Yes |
| <b>NDUFS3</b>   | 8824 | -2.49051 | -0.35814905 | Yes |
| <b>NDUFA12</b>  | 8865 | -2.53064 | -0.3514124  | Yes |
| <b>COX6A1</b>   | 8868 | -2.53283 | -0.34107557 | Yes |
| <b>NDUFB3</b>   | 8881 | -2.55185 | -0.33168614 | Yes |
| <b>ATP6V0C</b>  | 8883 | -2.55293 | -0.32125458 | Yes |
| <b>NDUFC2</b>   | 8895 | -2.56272 | -0.3117704  | Yes |
| <b>COX7C</b>    | 8897 | -2.56628 | -0.30133885 | Yes |
| <b>ATP5A1</b>   | 8925 | -2.58488 | -0.29337054 | Yes |
| <b>ATP6V1D</b>  | 8948 | -2.60505 | -0.28492856 | Yes |
| <b>ATP5B</b>    | 8976 | -2.62215 | -0.27696028 | Yes |
| <b>NDUFA2</b>   | 8989 | -2.63318 | -0.26757085 | Yes |
| <b>UQCRB</b>    | 9060 | -2.69661 | -0.26367646 | Yes |
| <b>ATP6V1G1</b> | 9082 | -2.71258 | -0.25513974 | Yes |
| <b>UQCRC1</b>   | 9116 | -2.75001 | -0.2477399  | Yes |
| <b>ATP5J</b>    | 9138 | -2.77487 | -0.23920316 | Yes |
| <b>ATP6V0D2</b> | 9158 | -2.80334 | -0.23047695 | Yes |
| <b>NDUFS4</b>   | 9167 | -2.80883 | -0.22070856 | Yes |
| <b>ATP5J2</b>   | 9186 | -2.82266 | -0.2118876  | Yes |
| <b>NDUFB6</b>   | 9251 | -2.88011 | -0.20742476 | Yes |
| <b>NDUFS8</b>   | 9280 | -2.90471 | -0.19955121 | Yes |
| <b>ATP6AP1</b>  | 9380 | -3.00189 | -0.19840434 | Yes |
| <b>ATP5I</b>    | 9421 | -3.04073 | -0.19166769 | Yes |
| <b>COX4I1</b>   | 9425 | -3.0424  | -0.1814256  | Yes |
| <b>NDUFAB1</b>  | 9460 | -3.08464 | -0.1741205  | Yes |
| <b>NDUFV1</b>   | 9506 | -3.1366  | -0.16785757 | Yes |
| <b>ATP5F1</b>   | 9510 | -3.14174 | -0.15761548 | Yes |
| <b>ATP5C1</b>   | 9539 | -3.16698 | -0.14974193 | Yes |
| <b>ATP5A1W</b>  | 9619 | -3.25551 | -0.14670023 | Yes |
| <b>ATP6V1C2</b> | 9623 | -3.25652 | -0.13645813 | Yes |
| <b>NDUFA7</b>   | 9698 | -3.32849 | -0.13294272 | Yes |
| <b>UQCRQ</b>    | 9762 | -3.3862  | -0.12838513 | Yes |
| <b>ATP5H</b>    | 9785 | -3.40937 | -0.11994313 | Yes |
| <b>UQCRH</b>    | 9817 | -3.45424 | -0.11235382 | Yes |

|                |       |          |             |     |
|----------------|-------|----------|-------------|-----|
| <b>NDUFA8</b>  | 9822  | -3.46131 | -0.10220647 | Yes |
| <b>NDUFA4</b>  | 9836  | -3.47879 | -0.0929118  | Yes |
| <b>SDHD</b>    | 9847  | -3.49228 | -0.0833329  | Yes |
| <b>NDUFA1</b>  | 9850  | -3.49516 | -0.07299607 | Yes |
| <b>NDUFB1</b>  | 9869  | -3.52262 | -0.0641751  | Yes |
| <b>UQCRC2</b>  | 9883  | -3.54112 | -0.05488043 | Yes |
| <b>NDUFA6</b>  | 9987  | -3.65515 | -0.05411252 | Yes |
| <b>NDUFB5</b>  | 9993  | -3.66592 | -0.04405992 | Yes |
| <b>SDHB</b>    | 10000 | -3.67091 | -0.03410205 | Yes |
| <b>ATP5O</b>   | 10074 | -3.77651 | -0.03049189 | Yes |
| <b>SDHA</b>    | 10119 | -3.8581  | -0.02413421 | Yes |
| <b>COX6C</b>   | 10179 | -3.95012 | -0.01919766 | Yes |
| <b>ATP5G1</b>  | 10223 | -4.02997 | -0.01274525 | Yes |
| <b>NDUFA5</b>  | 10263 | -4.0866  | -0.00591386 | Yes |
| <b>NDUFS6</b>  | 10267 | -4.09482 | 0.00432823  | Yes |
| <b>NDUFB9</b>  | 10327 | -4.19777 | 0.009264777 | Yes |
| <b>NDUFB10</b> | 10419 | -4.36146 | 0.011169587 | Yes |
| <b>NDUFS1</b>  | 10489 | -4.49781 | 0.015158718 | Yes |

---

102

103

104

105 In **Figure 5c** we showed the heat map representation of the most up-regulated (top)  
 106 and down-regulated (bottom) genes of the ERBB Signaling Pathway in ML tumors vs.  
 107 normal samples. The list of the most up-regulated genes showed in the heat-map from  
 108 top to bottom is:

109

| PROBE    | RANK IN GENE LIST | RANK METRIC SCORE | RUNNING ES | CORE ENRICHMENT |
|----------|-------------------|-------------------|------------|-----------------|
| MYC      | 0                 | 4.996099          | 0.018182   | Yes             |
| CIP1     | 200               | 3.772469          | 0.017581   | Yes             |
| RAF1     | 258               | 3.657594          | 0.030383   | Yes             |
| BRAF     | 355               | 3.461406          | 0.039504   | Yes             |
| ERBB3    | 420               | 3.36342           | 0.051645   | Yes             |
| TGFA     | 461               | 3.305974          | 0.066052   | Yes             |
| PIK3R5   | 510               | 3.228925          | 0.079703   | Yes             |
| GAB1     | 600               | 3.121755          | 0.089485   | Yes             |
| PAK1     | 821               | 2.865258          | 0.086902   | Yes             |
| PIK3CD   | 1243              | 2.480062          | 0.065348   | Yes             |
| ERBB2    | 1560              | 2.260876          | 0.053705   | Yes             |
| SHC4     | 1749              | 2.131556          | 0.054142   | Yes             |
| MAP2K1   | 1872              | 2.056336          | 0.060809   | Yes             |
| PAK7     | 1899              | 2.037929          | 0.076537   | Yes             |
| NRAS     | 2076              | 1.942731          | 0.078107   | Yes             |
| SHC1     | 2202              | 1.87839           | 0.084491   | Yes             |
| PIK3R2   | 2290              | 1.836239          | 0.094461   | Yes             |
| AKT1     | 2410              | 1.767826          | 0.101411   | Yes             |
| PIK3CB   | 2541              | 1.692321          | 0.107323   | Yes             |
| SOS2     | 2649              | 1.631977          | 0.115406   | Yes             |
| CAMK2D   | 2826              | 1.526355          | 0.116976   | Yes             |
| PAK6     | 2863              | 1.505315          | 0.13176    | Yes             |
| CAMK2B   | 3044              | 1.41424           | 0.132953   | Yes             |
| CAMK2A   | 3286              | 1.288265          | 0.128388   | Yes             |
| GRB2     | 3314              | 1.275653          | 0.144022   | Yes             |
| MAP2K4   | 3434              | 1.216933          | 0.150972   | Yes             |
| PIK3R3   | 3457              | 1.205967          | 0.167077   | Yes             |
| MAPK8    | 3495              | 1.188499          | 0.181767   | Yes             |
| CBLB     | 3712              | 1.07358           | 0.179562   | Yes             |
| HBEGF    | 3742              | 1.056185          | 0.195006   | Yes             |
| HRAS     | 4076              | 0.901284          | 0.181758   | No              |
| PAK2     | 4973              | 0.381219          | 0.115372   | No              |
| NRG1     | 5238              | 0.213532          | 0.108636   | No              |
| CRK      | 5770              | -0.13483          | 0.0767     | No              |
| NRG4     | 5897              | -0.23087          | 0.082989   | No              |
| EIF4EBP1 | 5940              | -0.25432          | 0.097207   | No              |
| PRKCA    | 6045              | -0.33074          | 0.105573   | No              |

|                |       |          |          |    |
|----------------|-------|----------|----------|----|
| <b>RPS6KB1</b> | 6183  | -0.4269  | 0.110824 | No |
| <b>NCK2</b>    | 6295  | -0.50276 | 0.118529 | No |
| <b>SRC</b>     | 6304  | -0.51052 | 0.135956 | No |
| <b>CRKL</b>    | 6860  | -0.92467 | 0.101755 | No |
| <b>MAP2K2</b>  | 7099  | -1.11737 | 0.097473 | No |
| <b>KRAS</b>    | 7224  | -1.22523 | 0.103951 | No |
| <b>AKT3</b>    | 7535  | -1.46593 | 0.092874 | No |
| <b>PIK3CA</b>  | 7903  | -1.7552  | 0.076417 | No |
| <b>STAT5B</b>  | 8005  | -1.82755 | 0.085066 | No |
| <b>GSK3B</b>   | 8545  | -2.27235 | 0.052375 | No |
| <b>ERBB4</b>   | 8643  | -2.34714 | 0.061401 | No |
| <b>BTC</b>     | 8667  | -2.37286 | 0.077412 | No |
| <b>MAPK1</b>   | 9008  | -2.65165 | 0.063503 | No |
| <b>MAPK9</b>   | 9361  | -2.97883 | 0.048462 | No |
| <b>EGFR</b>    | 9367  | -2.98745 | 0.066172 | No |
| <b>PIK3R1</b>  | 9558  | -3.1831  | 0.066421 | No |
| <b>PTK2</b>    | 9959  | -3.62362 | 0.046849 | No |
| <b>JUN</b>     | 10629 | -4.91332 | 0.001888 | No |

---
